# Supplementary material for: Rapid unwinding of triplet repeat hairpins by Srs2 helicase of Saccharomyces cerevisiae
Source: PubMed Central journal article supplement — Nucleic Acids Res. 2008 Apr 25;36(10):3366–73. doi: 10.1093/nar/gkn225 (PMC2425488; doi:10.1093/nar/gkn225), 2008-04-25

Supplemental Data

Rapid unwinding of triplet repeat hairpins by Srs2 helicase of *Saccharomyces cerevisiae*\*

Alok Dhar<sup>1</sup> and Robert S. Lahue<sup>1,2,¶</sup>

<sup>1</sup>Eppley Institute for Research in Cancer and Allied Diseases, University of Nebraska Medical Center, Box 986805, Omaha, NE 68198-6805 USA; <sup>2</sup>Department of Biochemistry, National University of Ireland, Galway, Ireland

SUPPLEMENTAL FIGURE 1. **Unwinding of Watson-crick duplex and (CTG)<sub>5</sub>·(CTG)<sub>5</sub> substrates by Srs2 and Sgs1.** Purified Srs2 or Sgs1 (10 nM each) were incubated with the DNA substrates (0.5 nM) for the indicated times. For 0 min, the substrate was incubated without protein. The reactions were quenched and the products were resolved on 12% nondenaturing polyacrylamide gel and visualized by phosphorimaging. *A*, control substrate containing Watson-Crick pairs. *B*, (CTG)<sub>5</sub>·(CTG)<sub>5</sub> containing DNA. The *thicker lines* represent the position of the CTG repeats. *C* and *D*, quantitation of helicase activity on control (*C*) and (CTG)<sub>5</sub>-(CTG)<sub>5</sub> DNA substrates (*D*). The extent of unwinding at each time point was quantified by phosphorimaging. The results were averaged from three repetitions (including that shown in panels *A* and *B*). Error bars are ± one S.D. Filled squares, Srs2; unfilled squares, Sgs1.

Fig. S1 Dhar and Lahue

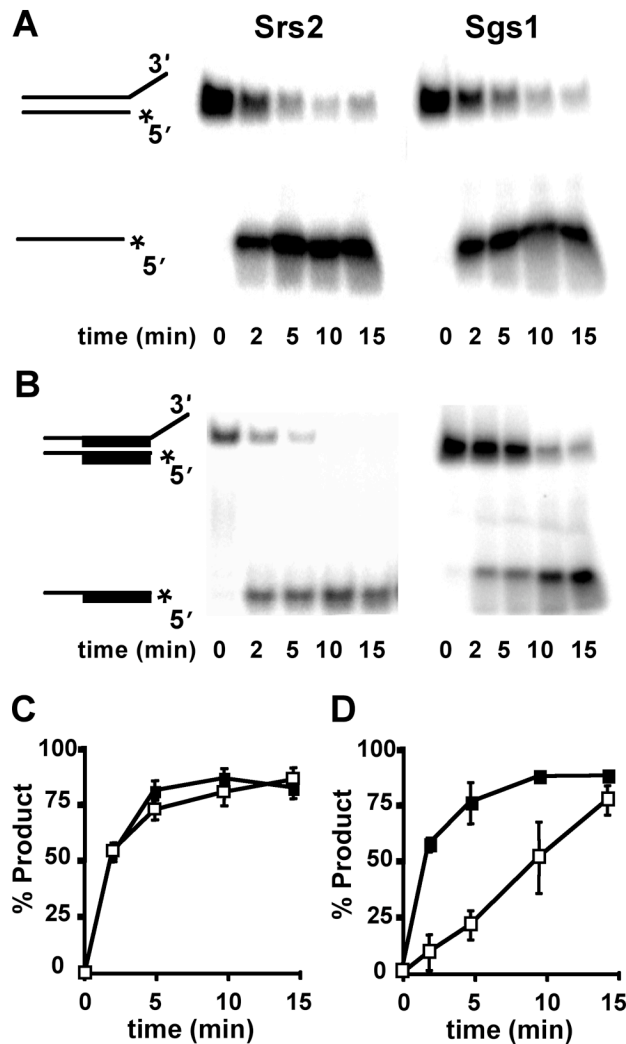

Supplement: gkn225_1.pdf [file gkn225_1.pdf]
